CORRECTION

# Correction: Comprehensive, Population-Based Sensitivity Analysis of a Two-Mass Vocal Fold Model

Daniel Robertson, Matías Zañartu, Douglas Cook

There are errors in the Funding section. The correct funding information is as follows: This research was supported by funding from New York University Abu Dhabi and Comisión Nacional de Investigación Científica y Tecnológica (Republic of Chile), grants FONDECYT 1151077 and BASAL FB0008.

## Reference

1. Robertson D, Zañartu M, Cook D (2016) Comprehensive, Population-Based Sensitivity Analysis of a Two-Mass Vocal Fold Model. PLoS ONE 11(2): e0148309. doi:[10.1371/journal.pone.0148309](https://doi.org/10.1371/journal.pone.0148309) PMID: [26845452](https://pubmed.ncbi.nlm.nih.gov/26845452/)

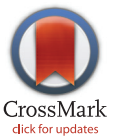

## OPEN ACCESS

**Citation:** Robertson D, Zañartu M, Cook D (2016) Correction: Comprehensive, Population-Based Sensitivity Analysis of a Two-Mass Vocal Fold Model. PLoS ONE 11(5): e0156569. doi:[10.1371/journal.pone.0156569](https://doi.org/10.1371/journal.pone.0156569)

**Published:** May 27, 2016

**Copyright:** © 2016 Robertson et al. This is an open access article distributed under the terms of the [Creative Commons Attribution License](https://creativecommons.org/licenses/by/4.0/), which permits unrestricted use, distribution, and reproduction in any medium, provided the original author and source are credited.
